# Supplementary material
Source: Springer Nature journal article supplement (https://www.springermedizin.de/resource/supplementary/12936_2008_620_MOESM7_ESM.pdf/9547840)
Supplement: MOESM7 [file 9547840]

**Proportion of rural and urban under-five children who used nets the night before the survey by caregiver's education level and type of net used.**

| <b>Caregiver's<br/>education level</b> | <b>Residence</b>  |                   |                   |               |
|----------------------------------------|-------------------|-------------------|-------------------|---------------|
|                                        | <i>Rural</i>      |                   | <i>Urban</i>      |               |
|                                        | <i>Any net</i>    | <i>ITN</i>        | <i>Any net</i>    | <i>ITN</i>    |
|                                        | <i>(n=259)</i>    | <i>(n=30)</i>     | <i>(n=130)</i>    | <i>(n=23)</i> |
|                                        | % (n)             | % (n)             | % (n)             | % (n)         |
| None                                   | 25.0 (63)         | 16.7 (5)          | 13.6 (17)         | 14.3 (3)      |
| Primary                                | 31.0 (78)         | 26.7 (8)          | 20.0 (25)         | 14.3 (3)      |
| Secondary                              | 24.2 (61)         | 26.7 (8)          | 48.0 (60)         | 54.4 (11)     |
| Higher                                 | 19.8 (50)         | 30.0 (9)          | 18.4 (23)         | 19.0 (4)      |
| Total                                  | 100 (252)         | 100 (30)          | 100 (125)         | 100 (21)      |
| <i>p-value for <math>\chi^2</math></i> | <i>&lt;0.0001</i> | <i>&lt;0.0001</i> | <i>&lt;0.0001</i> | <i>0.146</i>  |
